# Supplementary material for: Characterising the Seasonal and Geographical Variability of Tropospheric Ozone, Stratospheric Influence and Recent Changes
Source: Copernicus journal article supplement (doi:10.5194/acp-2018-1026), 2018-10-30
Supplement: Supplementary file 1 [file acp-2018-1026-supplement.pdf]

**Characterising the Seasonal and Geographical Variability of Tropospheric Ozone,  
Stratospheric Influence and Recent Changes (Supplementary Material)**

| <b>DJF</b>       | <b>OMI</b> | <b>EMAC-<br/>OMI</b> | <b>CMAM-<br/>OMI</b> | <b>EMAC-<br/>OMI (AK)</b> | <b>CMAM-OMI<br/>(AK)</b> | <b>Δ EMAC-<br/>OMI</b> | <b>Δ CMAM-<br/>OMI</b> |
|------------------|------------|----------------------|----------------------|---------------------------|--------------------------|------------------------|------------------------|
| <b>60°N-90°N</b> | 26.47      | -6.92                | -9.92                | -3.58                     | -3.71                    | 3.34                   | 6.21                   |
| <b>30°N-60°N</b> | 20.78      | 0.04                 | -3.24                | 1.41                      | -0.09                    | 1.36                   | 3.15                   |
| <b>0°N-30°N</b>  | 16.51      | 5.32                 | -0.03                | 4.55                      | -0.70                    | -0.86                  | -0.68                  |
| <b>30°S-0°N</b>  | 14.13      | 2.16                 | -0.76                | 1.91                      | -0.82                    | -0.25                  | -0.06                  |
| <b>60°S-30°S</b> | 13.96      | -0.51                | -2.14                | 1.45                      | 1.16                     | 1.96                   | 3.31                   |
| <b>90°S-60°S</b> | 9.60       | -2.86                | -3.83                | -0.46                     | 0.57                     | 2.40                   | 4.40                   |
| <b>MAM</b>       | <b>OMI</b> | <b>EMAC-<br/>OMI</b> | <b>CMAM-<br/>OMI</b> | <b>EMAC-<br/>OMI (AK)</b> | <b>CMAM-OMI<br/>(AK)</b> | <b>Δ EMAC-<br/>OMI</b> | <b>Δ CMAM-<br/>OMI</b> |
| <b>60°N-90°N</b> | 28.44      | -3.65                | -8.22                | 1.07                      | 0.14                     | 4.72                   | 8.36                   |
| <b>30°N-60°N</b> | 25.03      | 1.71                 | -3.37                | 3.70                      | 0.58                     | 2.00                   | 3.95                   |
| <b>0°N-30°N</b>  | 18.10      | 5.58                 | -0.94                | 4.83                      | -1.21                    | -0.75                  | -0.27                  |
| <b>30°S-0°N</b>  | 13.33      | 2.48                 | -0.63                | 2.29                      | -0.61                    | -0.19                  | 0.02                   |
| <b>60°S-30°S</b> | 14.11      | 0.55                 | -0.66                | 1.90                      | 2.22                     | 1.35                   | 2.88                   |
| <b>90°S-60°S</b> | 13.06      | -2.89                | -3.26                | -1.18                     | 0.34                     | 1.71                   | 3.59                   |
| <b>JJA</b>       | <b>OMI</b> | <b>EMAC-<br/>OMI</b> | <b>CMAM-<br/>OMI</b> | <b>EMAC-<br/>OMI (AK)</b> | <b>CMAM-OMI<br/>(AK)</b> | <b>Δ EMAC-<br/>OMI</b> | <b>Δ CMAM-<br/>OMI</b> |
| <b>60°N-90°N</b> | 25.88      | -4.93                | -7.96                | -1.10                     | -1.22                    | 4.08                   | 6.73                   |
| <b>30°N-60°N</b> | 24.09      | 0.29                 | -3.55                | 1.36                      | -1.55                    | 1.32                   | 2.00                   |
| <b>0°N-30°N</b>  | 15.22      | 3.73                 | -0.72                | 3.20                      | -1.85                    | -0.64                  | -1.12                  |
| <b>30°S-0°N</b>  | 16.54      | 2.76                 | -0.54                | 1.97                      | -1.35                    | -0.63                  | -0.81                  |
| <b>60°S-30°S</b> | 17.07      | -0.25                | -0.50                | 1.21                      | 2.78                     | 2.71                   | 3.28                   |
| <b>90°S-60°S</b> | 16.48      | -2.76                | -2.42                | -1.74                     | -1.23                    | 1.68                   | 1.19                   |
| <b>SON</b>       | <b>OMI</b> | <b>EMAC-<br/>OMI</b> | <b>CMAM-<br/>OMI</b> | <b>EMAC-<br/>OMI (AK)</b> | <b>CMAM-OMI<br/>(AK)</b> | <b>Δ EMAC-<br/>OMI</b> | <b>Δ CMAM-<br/>OMI</b> |
| <b>60°N-90°N</b> | 22.99      | -4.04                | -6.95                | -2.17                     | -2.08                    | 2.44                   | 4.87                   |
| <b>30°N-60°N</b> | 20.14      | 1.71                 | -2.34                | 2.02                      | -1.37                    | 0.50                   | 0.97                   |
| <b>0°N-30°N</b>  | 14.83      | 4.56                 | -0.85                | 4.06                      | -2.09                    | -0.64                  | -1.24                  |
| <b>30°S-0°N</b>  | 17.60      | 2.80                 | -1.02                | 2.21                      | -1.75                    | -0.60                  | -0.73                  |
| <b>60°S-30°S</b> | 17.28      | -0.07                | -1.61                | 2.12                      | 2.02                     | 2.19                   | 3.63                   |
| <b>90°S-60°S</b> | 11.52      | -1.93                | -2.58                | -1.54                     | -1.87                    | 0.39                   | 0.71                   |

*Table S1 – Seasonal mean 1000-450 hPa (0-5.5 km) subcolumn O<sub>3</sub> (DU) for 2005-2010 from OMI and differences with respect to both EMAC and CMAM both with and without AKs, together with the change (Δ) in bias through applying the OMI AKs on a zonal mean 30° latitude band basis.*

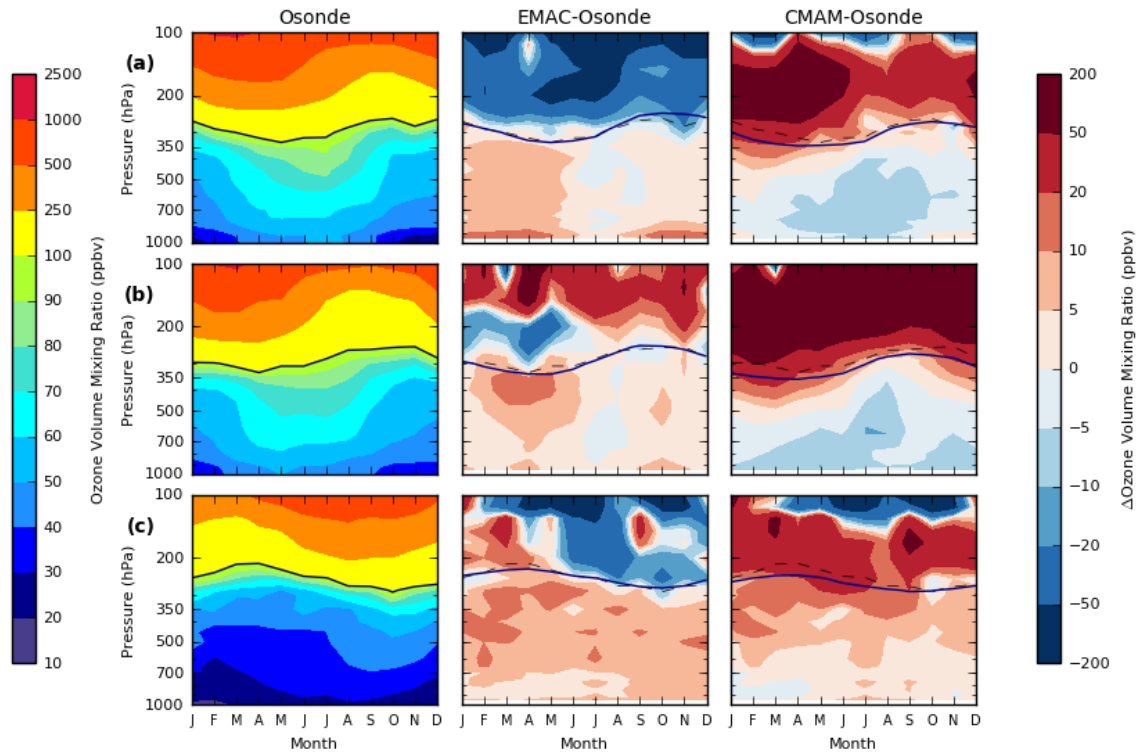

*Figure S1 – Monthly evolution of the vertical distribution of mean O<sub>3</sub> volume mixing ratio (VMR) (ppbv) derived from ozonesonde measurements (left column); EMAC minus ozonesonde differences (ppbv) (middle column) and CMAM minus ozonesonde differences (ppbv) (right column) over the period 1980-2010 inclusive for three different world regions: (a) Europe (n = 18), (b) eastern North America (n = 14) and (c) Tasman Sea (n = 6). The ozonesonde/model 100 ppbv contour (the ozone defined extratropical tropopause as identified in Bethan et al. (1996)) is additionally highlighted in bold (ozonesonde 100 ppbv contour indicated again by dashed line – middle and right column).*

| Pressure (hPa) | DJF           |                    |                    | MAM           |                    |                    |
|----------------|---------------|--------------------|--------------------|---------------|--------------------|--------------------|
|                | Osonde (ppbv) | EMAC-Osonde (ppbv) | CMAM-Osonde (ppbv) | Osonde (ppbv) | EMAC-Osonde (ppbv) | CMAM-Osonde (ppbv) |
| 100            | 958.1         | -86.7 (-9.1 %)     | -47.6 (-4.9 %)     | 1009.8        | -60.2 (-5.9%)      | -28.3 (-2.7 %)     |
| 200            | 591.4         | -48.5 (-8.3 %)     | +28.6 (+4.9 %)     | 677.2         | -27.3 (-4.0 %)     | +48.9 (+7.3 %)     |
| 350            | 62.3          | +4.9 (+7.7 %)      | +10.8 (+17.1 %)    | 83.7          | +5.8 (+7.1 %)      | +11.8 (+14.6 %)    |
| 500            | 51.2          | +5.4 (+10.6 %)     | +0.8 (+1.5 %)      | 67.0          | +7.1 (+10.5 %)     | -1.8 (-2.7 %)      |
| 850            | 45.6          | +4.5 (+9.9 %)      | -2.3 (-5.0 %)      | 57.8          | +5.9 (+10.2 %)     | -6.1 (-10.5 %)     |
| 1000           | 27.4          | +12.2 (+45.3 %)    | +1.4 (+5.6 %)      | 44.7          | +10.6 (+24.1 %)    | -5.2 (-11.5 %)     |
| Pressure (hPa) | JJA           |                    |                    | SON           |                    |                    |
|                | Osonde (ppbv) | EMAC-Osonde (ppbv) | CMAM-Osonde (ppbv) | Osonde (ppbv) | EMAC-Osonde (ppbv) | CMAM-Osonde (ppbv) |
| 100            | 738.3         | -85.6 (-11.7 %)    | -34.6 (-4.7 %)     | 712.7         | -86.7 (-12.1 %)    | -6.6 (-0.7 %)      |
| 200            | 453.5         | -60.0 (-13.6 %)    | +16.2 (+3.3 %)     | 377.0         | -41.5 (-10.8 %)    | +30.2 (+8.4 %)     |
| 350            | 88.0          | +1.2 (+1.3 %)      | +2.0 (+2.3 %)      | 65.9          | +1.6 (+2.6 %)      | +0.1 (+0.2 %)      |
| 500            | 75.2          | -1.0 (-1.2 %)      | -6.8 (-8.9 %)      | 57.9          | +2.0 (+3.7 %)      | -5.3 (-8.9 %)      |
| 850            | 59.4          | -0.2 (-0.3%)       | -8.6 (-14.4 %)     | 48.2          | +3.9 (+8.3 %)      | -4.9 (-10.2 %)     |

*Table S2a – Seasonally averaged ozone VMR (ppbv) values for six pressure levels between the surface (1000 hPa) and the lower stratosphere (100 hPa) derived from available ozonesondes measurements across Europe (30° N - 65° N, 15° W - 35° E) (n = 18) over the period 1980-2010 inclusive, together with the differences with respect to both EMAC and CMAM (also expressed in percentage terms).*

| Pressure (hPa) | DJF           |                    |                    | MAM           |                    |                    |
|----------------|---------------|--------------------|--------------------|---------------|--------------------|--------------------|
|                | Osonde (ppbv) | EMAC-Osonde (ppbv) | CMAM-Osonde (ppbv) | Osonde (ppbv) | EMAC-Osonde (ppbv) | CMAM-Osonde (ppbv) |
| 100            | 939.5         | +35.0 (+3.8 %)     | +56.6 (+6.2 %)     | 906.6         | +27.6 (+3.8 %)     | +57.9 (+7.6 %)     |
| 200            | 608.0         | +16.5 (+2.4 %)     | +81.7 (+13.3 %)    | 615.5         | +32.4 (+5.7 %)     | +104.1 (+17.7 %)   |
| 350            | 67.1          | +4.0 (+6.0 %)      | +17.5 (+25.9 %)    | 80.8          | +11.3 (+14.1 %)    | +19.7 (+25.0 %)    |
| 500            | 52.9          | +3.1 (+5.8 %)      | +0.6 (+1.0 %)      | 65.5          | +8.7 (+13.3 %)     | +1.3 (+2.2 %)      |
| 850            | 46.6          | +2.8 (+6.0 %)      | -3.8 (-8.2 %)      | 58.5          | +4.4 (+7.5 %)      | -5.8 (-9.9 %)      |
| 1000           | 33.5          | +4.6 (+13.6 %)     | -7.6 (-22.6 %)     | 47.0          | +4.8 (+10.2 %)     | -8.1 (-17.3 %)     |
| Pressure (hPa) | JJA           |                    |                    | SON           |                    |                    |
|                | Osonde (ppbv) | EMAC-Osonde (ppbv) | CMAM-Osonde (ppbv) | Osonde (ppbv) | EMAC-Osonde (ppbv) | CMAM-Osonde (ppbv) |
| 100            | 611.1         | +23.5 (+3.7 %)     | +96.0 (+15.8 %)    | 581.8         | +24.4 (+4.0 %)     | +99.4 (+17.2 %)    |
| 200            | 330.5         | +34.0 (+10.8 %)    | +125.6 (+39.3 %)   | 299.7         | +33.1 (+10.8 %)    | +97.2 (+32.4 %)    |
| 350            | 83.5          | +2.1 (+2.5 %)      | +0.7 (+0.7 %)      | 63.8          | +4.1 (+6.5 %)      | +3.5 (+5.8 %)      |
| 500            | 70.4          | +1.8 (+2.6 %)      | -5.1 (-7.3 %)      | 54.8          | +4.6 (+8.5 %)      | -1.9 (-3.5 %)      |
| 850            | 58.4          | -1.4 (-2.5 %)      | -6.8 (-11.7 %)     | 49.5          | +2.9 (+5.9 %)      | -4.8 (-9.8 %)      |
| 1000           | 46.4          | +2.1 (+4.4 %)      | -4.6 (-9.9 %)      | 36.2          | +6.2 (+17.2 %)     | -6.6 (-18.6 %)     |

*Table S2b – Same as for table 2a but for eastern North America (32.5° N - 60° N, 92.5° W - 55° W) (n = 14).*

| Pressure (hPa) | DJF           |                    |                    | MAM           |                    |                    |
|----------------|---------------|--------------------|--------------------|---------------|--------------------|--------------------|
|                | Osonde (ppbv) | EMAC-Osonde (ppbv) | CMAM-Osonde (ppbv) | Osonde (ppbv) | EMAC-Osonde (ppbv) | CMAM-Osonde (ppbv) |
| 100            | 485.3         | +13.2 (+3.0 %)     | +36.5 (+7.9 %)     | 544.0         | -44.7 (-8.1 %)     | -13.2 (-2.1 %)     |
| 200            | 294.1         | -9.4 (-2.7 %)      | +19.4 (+7.2 %)     | 270.3         | +6.3 (+3.4 %)      | +41.0 (+16.3 %)    |
| 350            | 52.7          | +7.8 (+15.0 %)     | +9.3 (+17.9 %)     | 42.5          | +11.1 (+26.5 %)    | +10.5 (+25.1 %)    |
| 500            | 40.1          | +9.1 (+22.9 %)     | +6.6 (+16.6 %)     | 36.2          | +9.6 (+26.6 %)     | +5.9 (+16.4 %)     |
| 850            | 26.9          | +6.0 (+22.5 %)     | +0.5 (+2.1 %)      | 29.5          | +4.9 (+17.6 %)     | +1.0 (+3.8 %)      |
| 1000           | 18.6          | +6.1 (+32.9 %)     | +1.2 (+6.8 %)      | 22.7          | +5.7 (+25.0 %)     | +2.0 (+8.5 %)      |
| Pressure (hPa) | JJA           |                    |                    | SON           |                    |                    |
|                | Osonde (ppbv) | EMAC-Osonde (ppbv) | CMAM-Osonde (ppbv) | Osonde (ppbv) | EMAC-Osonde (ppbv) | CMAM-Osonde (ppbv) |
| 100            | 807.3         | -72.7 (-9.1 %)     | -84.7 (-10.5 %)    | 848.8         | -64.9 (-7.6 %)     | -83.3 (-9.7 %)     |
| 200            | 486.1         | -45.6 (-9.5 %)     | -20.0 (-4.1 %)     | 463.9         | -5.8 (-1.2 %)      | +5.4 (+1.3 %)      |
| 350            | 50.4          | +6.5 (+13.7 %)     | +8.9 (+18.5 %)     | 61.2          | +6.1 (+10.2 %)     | +7.7 (+12.9 %)     |
| 500            | 40.8          | +7.8 (+19.3 %)     | +5.0 (+12.2 %)     | 46.6          | +8.8 (+18.9 %)     | +5.3 (+11.5 %)     |
| 850            | 36.6          | +3.3 (+8.9 %)      | +2.2 (+5.9 %)      | 35.5          | +6.7 (+18.8 %)     | +2.6 (+7.1 %)      |
| 1000           | 25.8          | +8.0 (+31.5 %)     | +6.9 (+27.3 %)     | 26.3          | +7.8 (+29.7 %)     | +3.1 (+11.3 %)     |

Table S2c – Same as for table 2a/2b but for the Tasman Sea region (15° S - 55° S, 140° E - 180° E) (n = 6).

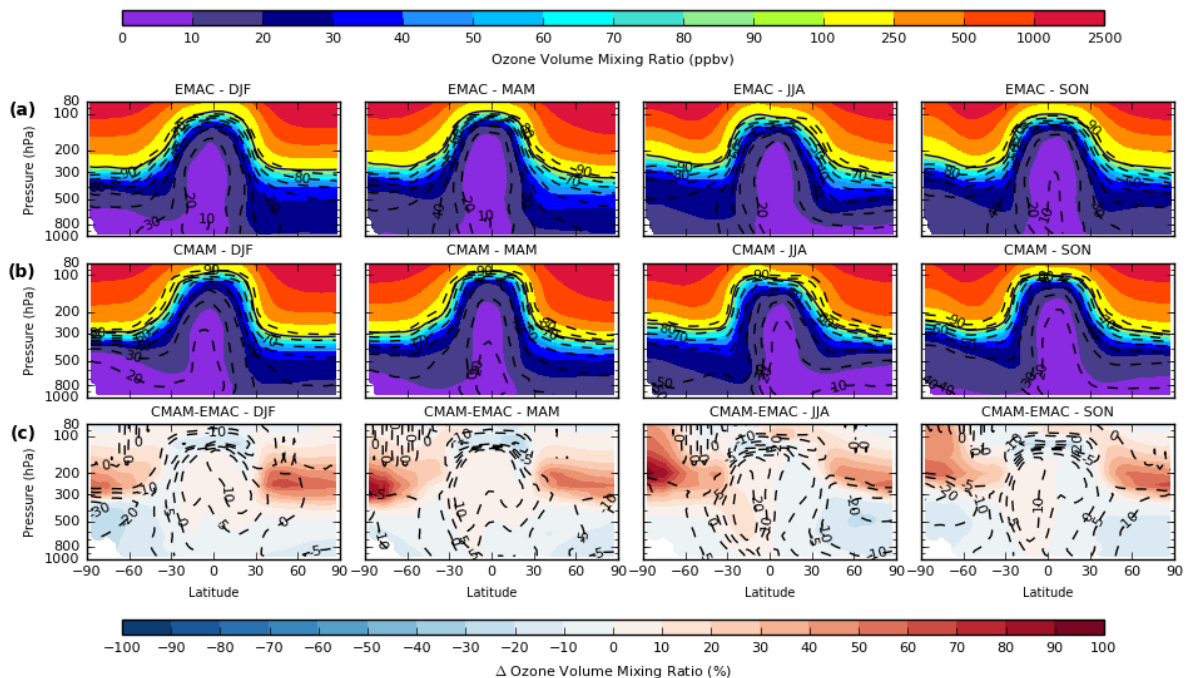

Figure S2 – Zonal mean seasonal composites of monthly mean  $O_3S$  concentration (ppbv) for the troposphere and lower stratosphere (1000-80 hPa) from (a) EMAC, (b) CMAM and (c) CMAM and EMAC (CMAM-EMAC) percentage differences over the period 1980-2010. Dashed lines indicate the stratospheric contribution (%) calculated using both ozone tracers in each model:  $O_3F$  (%) =  $(O_3S / O_3) \times 100$ . The 100 ppbv contour (bold line) is included as a reference for the tropopause altitude (top and middle row).

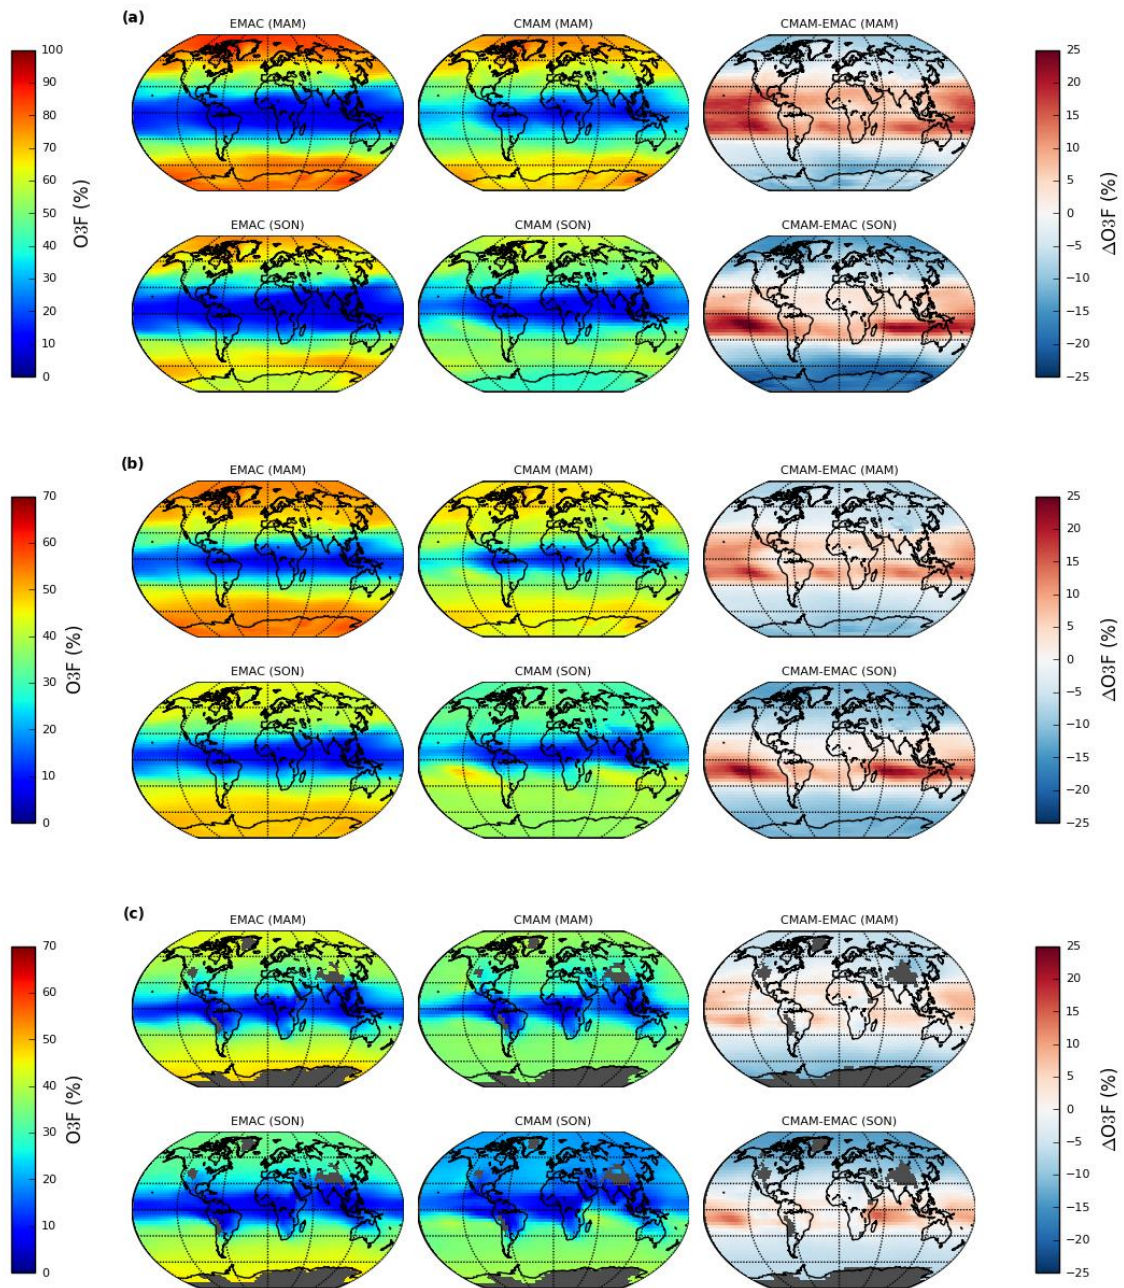

**Figure S3 – Seasonal (MAM/SON) composites of (a) 350 hPa, (b) 500 hPa and (c) 850 hPa monthly mean stratospheric ozone fraction ( $O_3F$ ) for EMAC (left), CMAM (middle) and CMAM-EMAC (right) over the period 1980-2010. Note the scale difference between (a) and (b-c).**

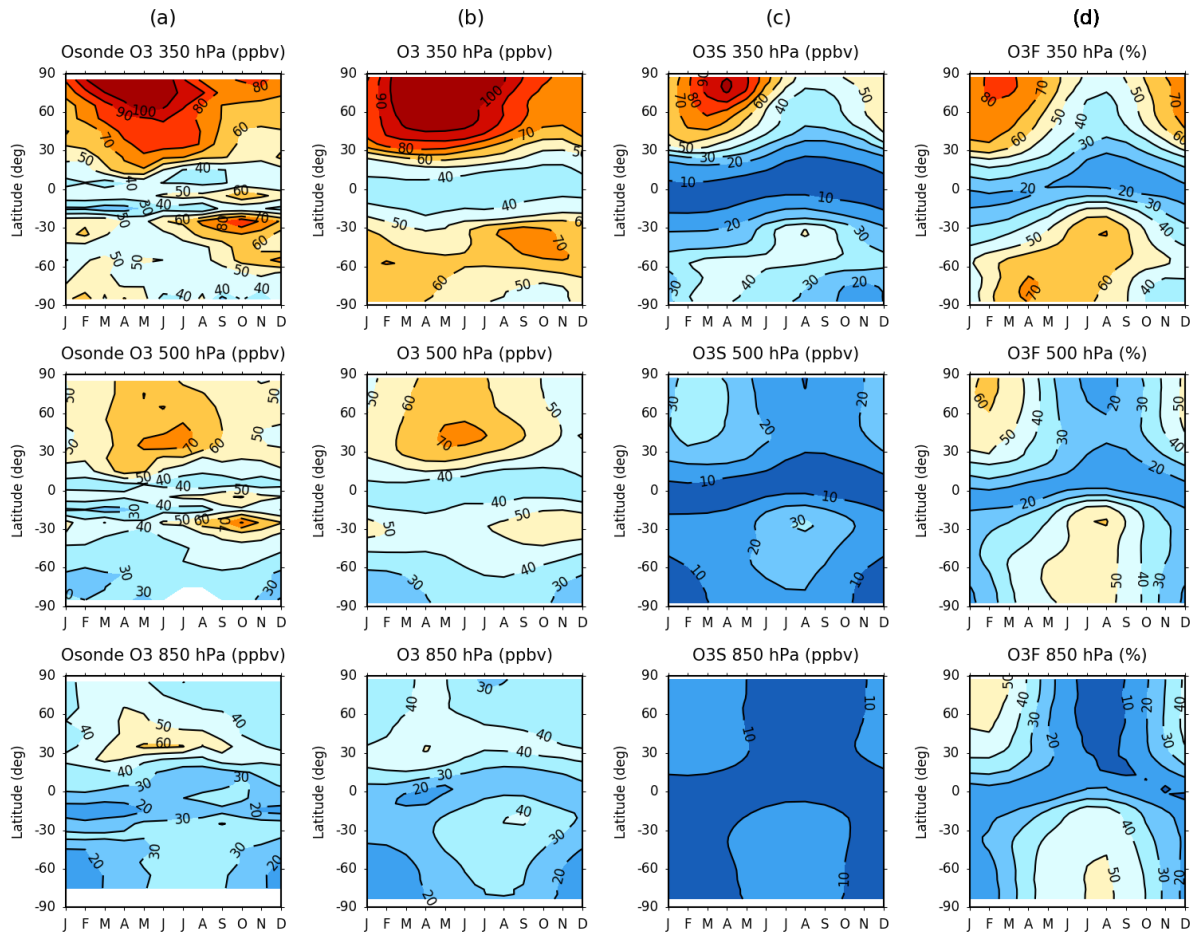

**Figure S4 – Zonal-mean monthly mean evolution of O<sub>3</sub> VMR concentration (ppbv) derived from (a) ozonesondes and (b) CMAM O<sub>3</sub> model tracer. The evolution of the (c) CMAN stratospheric O<sub>3</sub>S tracer and (d) O<sub>3</sub>F stratospheric fraction (%) are additionally included over the period 1980-2010 for 350 hPa (top row), 500 hPa (middle row) and 850 hPa (bottom row).**

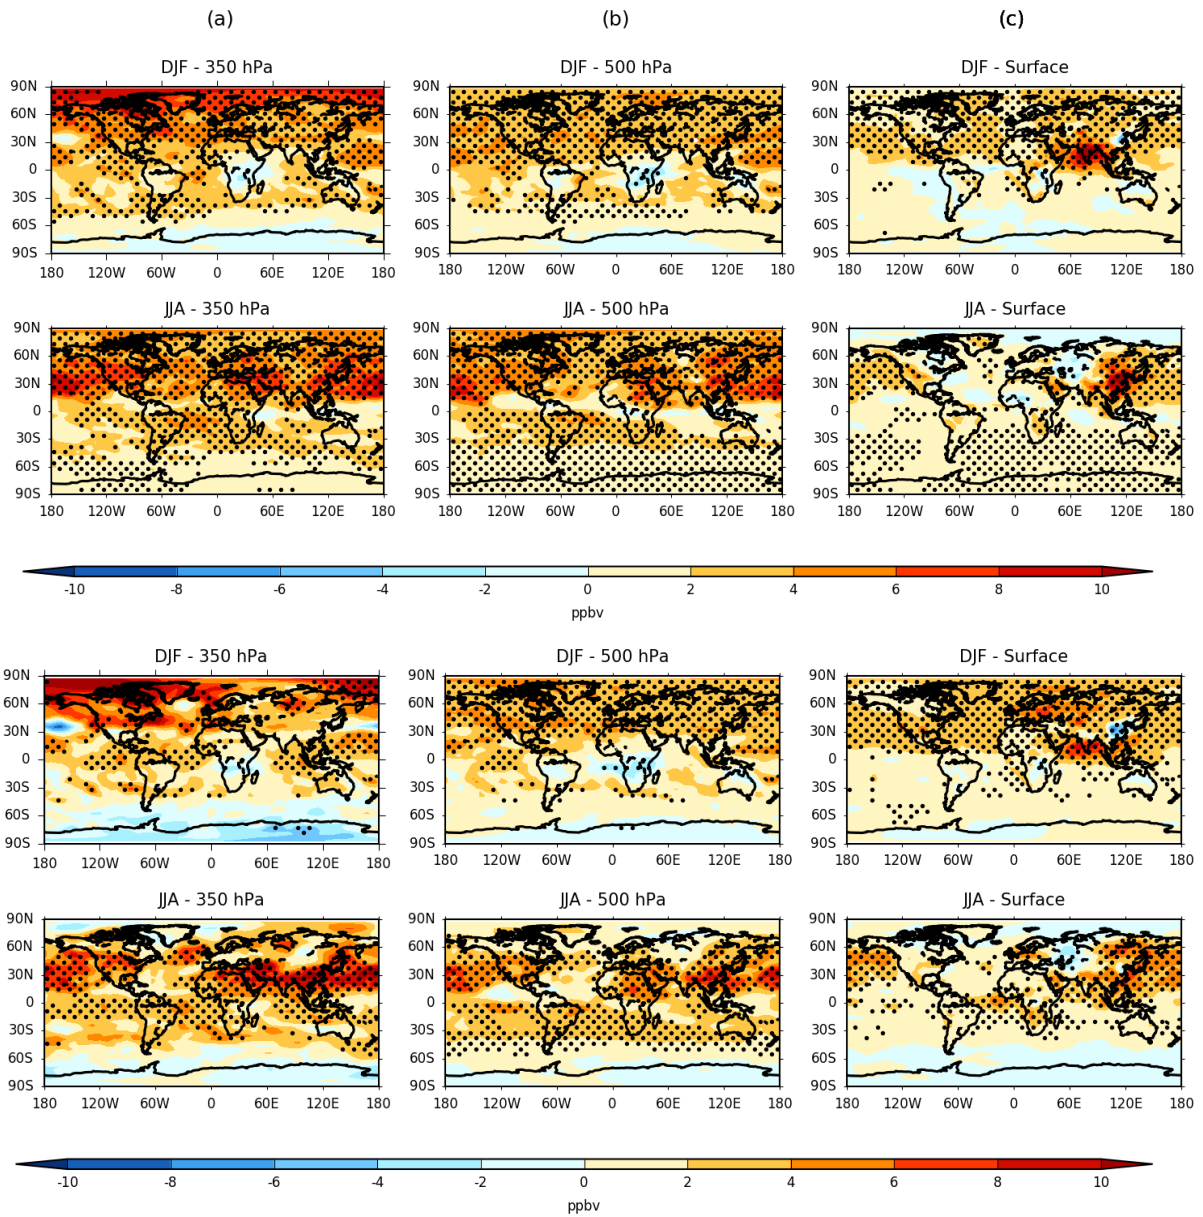

**Figure S5 – Seasonal change in EMAC (top) and CMAM (bottom) ozone (O<sub>3</sub>) VMR concentration (ppbv) between 1980-89 and 2001-10 for DJF and JJA at (a) 350 hPa, (b) 500 hPa and (c) the surface model level. Stippling denotes regions of statistical significance according to a paired two-sided t-test ( $p < 0.05$ ).**

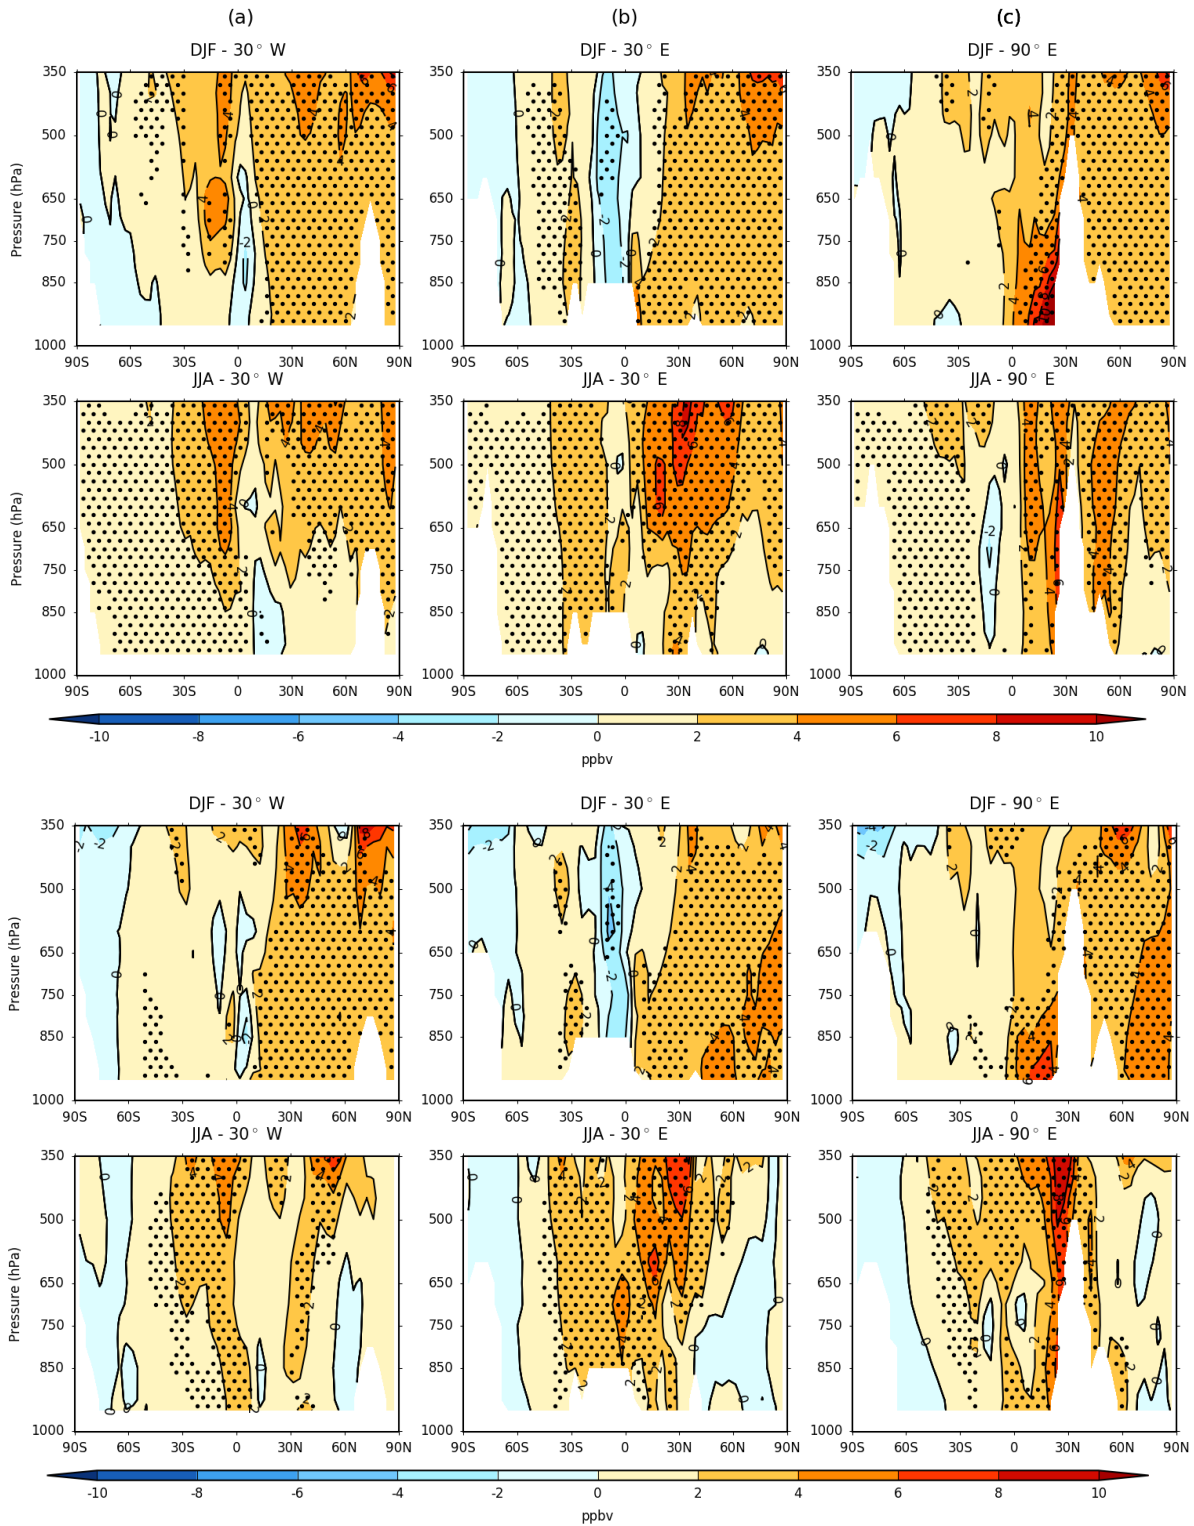

**Figure S6 – Longitudinal cross-sections of the seasonal change in the vertical distribution of ozone ( $O_3$ ) VMR (ppbv) from EMAC (top) and CMAM (bottom) between 1980-89 and 2001-10 for DJF and JJA at (a)  $30^\circ$  W, (b)  $30^\circ$  E and (c)  $90^\circ$  E. Stippling denotes regions of statistical significance according to a paired two-sided t-test ( $p < 0.05$ ).**



| DJF       | EMAC O3         |                |                | CMAM O3         |                |                 |
|-----------|-----------------|----------------|----------------|-----------------|----------------|-----------------|
|           | 350 hPa         | 500 hPa        | Surface        | 350 hPa         | 500 hPa        | Surface         |
| 60°N-90°N | +7.0 (+11.3 %)* | +3.6 (+7.4 %)* | +2.0 (+7.0 %)* | +7.1 (+8.7 %)   | +3.6 (+7.5 %)* | +2.7 (+13.3 %)* |
| 30°N-60°N | +4.4 (+6.6 %)*  | +3.7 (+6.8 %)* | +2.0 (+5.8 %)* | +3.6 (+4.9 %)   | +3.5 (+6.9 %)* | +2.8 (+13.4 %)* |
| 0°N-30°N  | +2.7 (+5.4 %)   | +2.7 (+5.4 %)  | +2.7 (+6.4 %)  | +2.5 (+6.4 %)   | +2.1 (+5.1 %)  | +2.6 (+8.0 %)   |
| 30°S-0°N  | +1.9 (+3.9 %)   | +1.5 (+3.1 %)  | +0.7 (+2.7 %)  | +1.5 (+4.0 %)   | +0.9 (+2.4 %)  | +0.8 (+4.0 %)   |
| 60°S-30°S | +1.7 (+2.9 %)   | +1.3 (+3.0 %)  | +0.2 (+1.0 %)  | +0.4 (+0.8 %)   | +0.9 (+2.0 %)  | +0.4 (+2.4 %)   |
| 90°S-60°S | -0.4 (-0.9 %)   | +0.1 (+0.3 %)  | +0.1 (+0.9 %)  | -2.3 (-3.5 %)   | -0.2 (-0.9 %)  | +0.1 (+0.7 %)   |
| MAM       | EMAC O3         |                |                | CMAM O3         |                |                 |
|           | 350 hPa         | 500 hPa        | Surface        | 350 hPa         | 500 hPa        | Surface         |
| 60°N-90°N | +3.4 (+3.7 %)   | +3.4 (+5.2 %)* | +1.6 (+4.5 %)  | +1.6 (+1.4 %)   | +3.0 (+4.8 %)  | +1.9 (+6.8 %)*  |
| 30°N-60°N | +4.8 (+5.4 %)*  | +3.7 (+5.2 %)* | +1.8 (+3.6 %)  | +5.0 (+5.3 %)   | +4.1 (+6.4 %)* | +2.4 (+6.7 %)   |
| 0°N-30°N  | +3.2 (+5.3 %)   | +3.4 (+5.7 %)  | +2.1 (+4.8 %)  | +2.9 (+6.6 %)   | +3.0 (+6.4 %)  | +2.7 (+8.7 %)   |
| 30°S-0°N  | +1.6 (+3.3 %)   | +1.3 (+2.8 %)  | +1.0 (+3.6 %)  | +1.5 (+4.3 %)   | +0.9 (+2.7 %)  | +0.9 (+4.3 %)   |
| 60°S-30°S | +1.2 (+2.4 %)   | +1.2 (+2.8 %)  | +0.4 (+1.7 %)  | -0.6 (-0.9 %)   | +0.1 (+0.1 %)  | -0.0 (-0.2 %)   |
| 90°S-60°S | +1.0 (+2.4 %)   | +0.8 (+2.8 %)  | +0.5 (+2.4 %)  | -2.2 (-3.4 %)   | -0.5 (-1.4 %)  | -0.3 (-1.5 %)   |
| JJA       | EMAC O3         |                |                | CMAM O3         |                |                 |
|           | 350 hPa         | 500 hPa        | Surface        | 350 hPa         | 500 hPa        | Surface         |
| 60°N-90°N | +4.0 (+4.7 %)*  | +3.7 (+6.1 %)* | +0.3 (+0.9 %)  | +1.8 (+1.7 %)   | +1.1 (+1.9 %)  | +0.2 (+0.8 %)   |
| 30°N-60°N | +5.4 (+6.5 %)*  | +4.5 (+6.5 %)* | +1.8 (+5.0 %)  | +4.6 (+5.7 %)   | +3.2 (+5.1 %)  | +2.0 (+6.6 %)   |
| 0°N-30°N  | +3.9 (+6.9 %)   | +3.5 (+6.5 %)  | +1.7 (+5.6 %)  | +4.3 (+10.1 %)  | +3.2 (+7.9 %)  | +2.1 (+8.5 %)   |
| 30°S-0°N  | +2.3 (+4.2 %)   | +2.1 (+4.0 %)  | +0.9 (+2.8 %)  | +2.5 (+6.7 %)   | +2.6 (+6.4 %)  | +1.3 (+4.7 %)   |
| 60°S-30°S | +1.9 (+3.5 %)   | +1.7 (+3.8 %)* | +0.7 (+2.4 %)* | +1.9 (+3.0 %)   | +1.5 (+3.4 %)  | +0.1 (+0.4 %)   |
| 90°S-60°S | +1.0 (+2.4 %)   | +1.1 (+3.1 %)* | +0.8 (+3.2 %)* | -0.7 (-1.3 %)   | -0.1 (-0.3 %)  | -0.2 (-0.9 %)   |
| SON       | EMAC O3         |                |                | CMAM O3         |                |                 |
|           | 350 hPa         | 500 hPa        | Surface        | 350 hPa         | 500 hPa        | Surface         |
| 60°N-90°N | +4.4 (+7.3 %)*  | +3.7 (+7.3 %)* | +2.0 (+7.1 %)* | +4.1 (+5.4 %)   | +3.0 (+6.1 %)* | +2.1 (+10.5 %)* |
| 30°N-60°N | +4.5 (+6.9 %)*  | +4.4 (+7.7 %)* | +2.1 (+5.7 %)  | +5.3 (+8.4 %)*  | +4.8 (+9.4 %)* | +2.7 (10.7 %)*  |
| 0°N-30°N  | +3.4 (+6.7 %)   | +3.3 (+6.6 %)  | +2.3 (+6.6 %)  | +3.8 (+10.2 %)* | +3.2 (+8.9 %)  | +2.7 (+10.3 %)* |
| 30°S-0°N  | +2.6 (+4.6 %)   | +2.3 (+4.2 %)  | +0.8 (+2.6 %)  | +2.6 (+6.6 %)   | +2.3 (+5.5 %)  | +1.3 (+5.3 %)   |
| 60°S-30°S | +2.0 (+3.1 %)   | +1.7 (+3.6 %)  | +0.4 (+1.6 %)  | +1.7 (+2.4 %)   | +1.9 (+4.1 %)* | +0.7 (+2.7 %)*  |
| 90°S-60°S | +1.4 (+3.3 %)   | +0.9 (+2.6 %)  | +0.6 (+2.5 %)  | +2.4 (+4.7 %)   | +1.3 (+3.8 %)  | +0.5 (+2.1 %)   |

*Table S3 - 30° latitude band changes in seasonal mean ozone (O<sub>3</sub>) VMR (ppbv) (also expressed in percentage (%) terms) between 1980-89 and 2001-10 at 350 hPa, 500 hPa and the surface (left to right for each model). Values denoted with an asterisk (\*) represent statistical significance at the 95% confidence level ( $p < 0.05$ ) as determined by a two-sided paired *t*-test.*

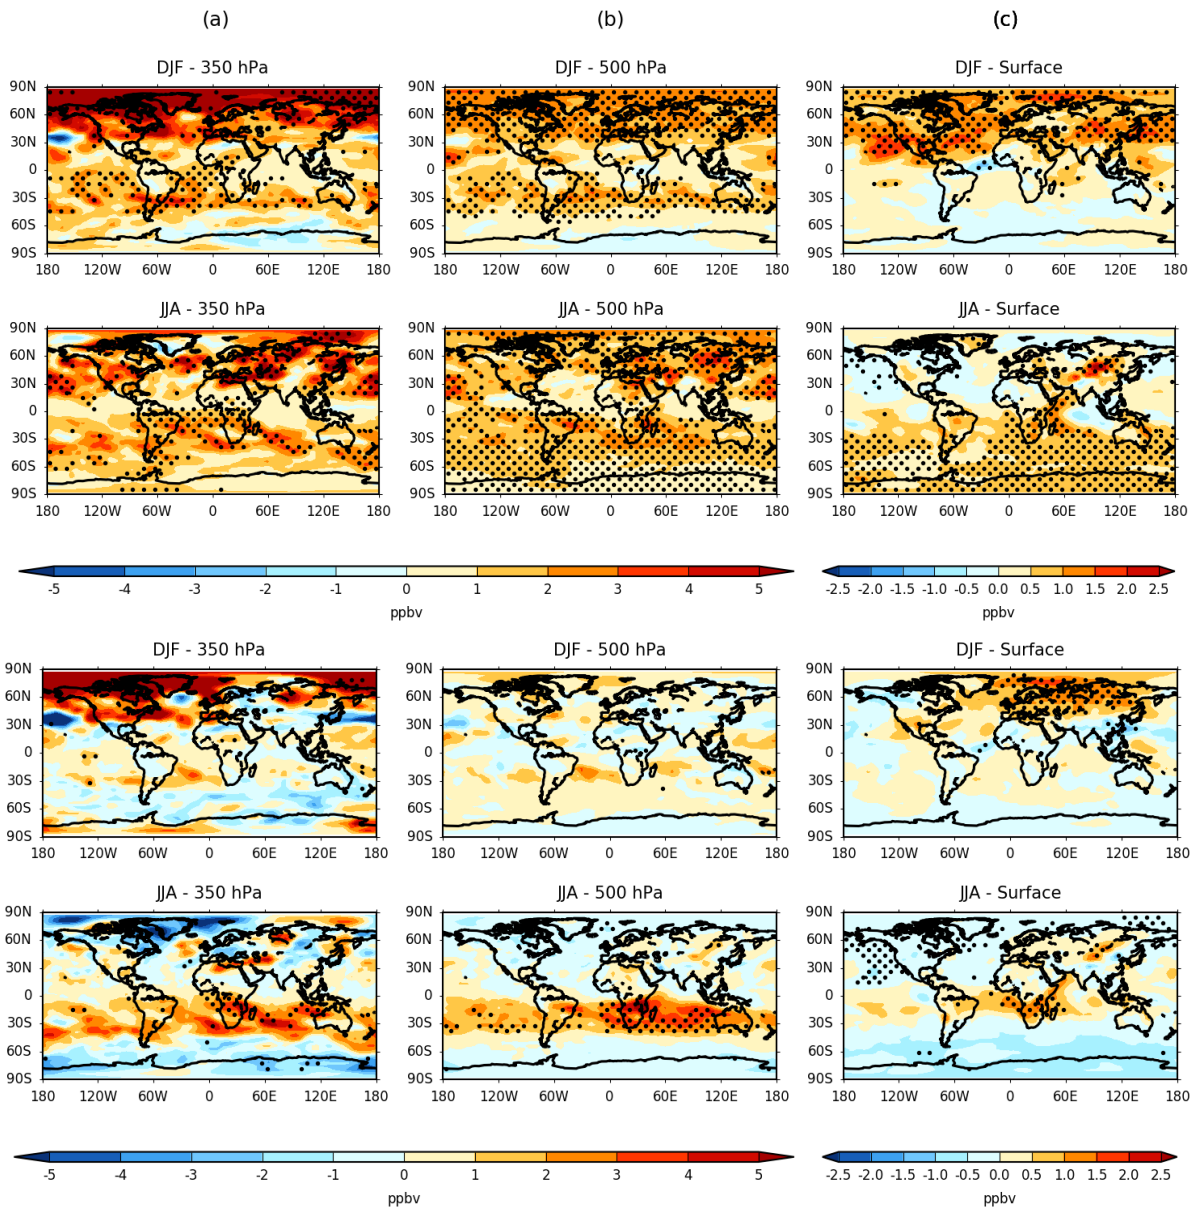

**Figure S7 – Seasonal change in EMAC (top) and CMAM (bottom) stratospheric ozone ( $O_3S$ ) VMR concentration (ppbv) between 1980-89 and 2001-10 for DJF and JJA at (a) 350 hPa, (b) 500 hPa and (c) the surface model level. Stippling denotes regions of statistical significance according to a paired two-sided  $t$ -test ( $p < 0.05$ ). Note the scale difference between (a-b) and (c).**

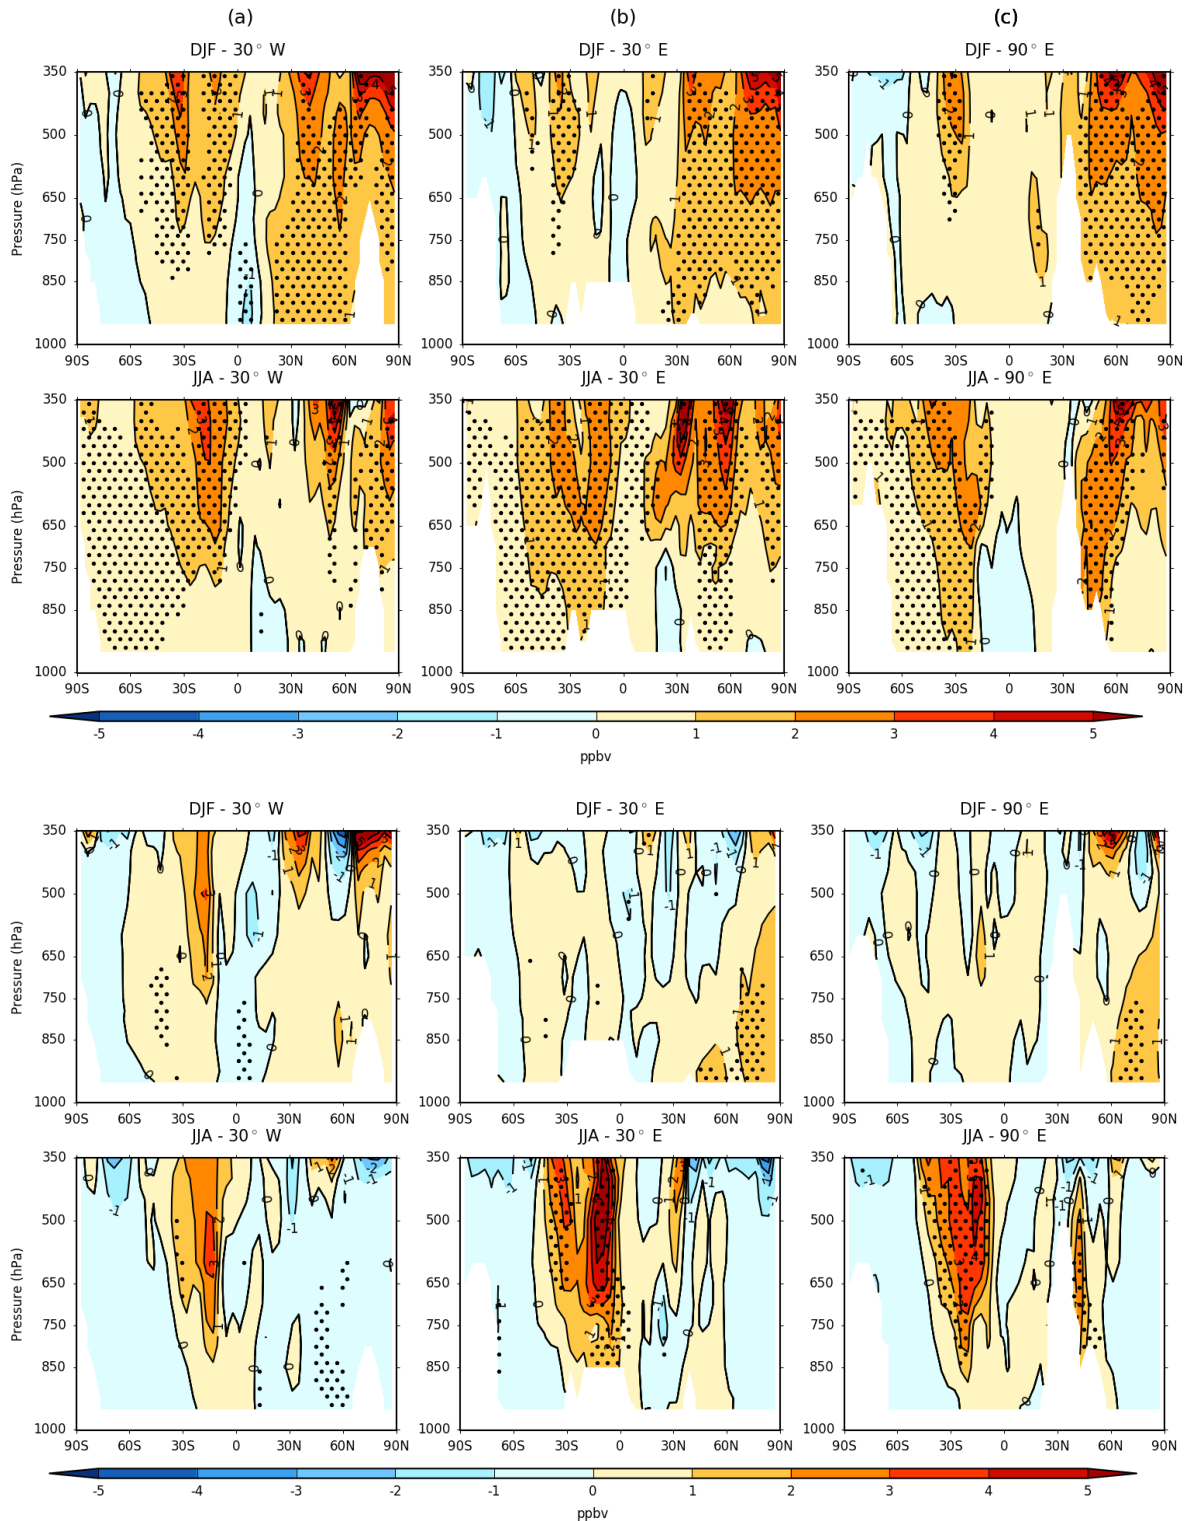

**Figure S8 – Longitudinal cross-sections of the seasonal change in the vertical distribution of stratospheric ozone ( $O_3S$ ) VMR (ppbv) from EMAC (top) and CMAM (bottom) between 1980-89 and 2001-10 for DJF and JJA at (a) 30° W, (b) 30° E and (c) 90° E. Stippling denotes regions of statistical significance according to a paired two-sided t-test ( $p < 0.05$ ).**

| DJF       | EMAC O3S       |                |                | CMAM O3S      |                |               |
|-----------|----------------|----------------|----------------|---------------|----------------|---------------|
|           | 350 hPa        | 500 hPa        | Surface        | 350 hPa       | 500 hPa        | Surface       |
| 60°N-90°N | +6.9 (+14.0 %) | +2.4 (+8.4 %)* | +0.9 (+6.1 %)  | +5.3 (+8.1 %) | +0.5 (+1.8 %)  | +0.5 (+5.9 %) |
| 30°N-60°N | +2.8 (+6.2 %)  | +1.9 (+6.7 %)* | +1.0 (+5.9 %)  | +0.7 (+1.5 %) | +0.0 (+0.1 %)  | +0.3 (+3.4 %) |
| 0°N-30°N  | +0.9 (+8.1 %)  | +1.0 (+7.9 %)  | +0.5 (+5.1 %)  | +0.2 (+2.1 %) | -0.0 (-0.1 %)  | -0.1 (-1.3 %) |
| 30°S-0°N  | +1.2 (+13.2 %) | +1.1 (+11.6 %) | +0.1 (+4.2 %)  | +0.3 (+3.0 %) | +0.3 (+2.7 %)  | +0.0 (+0.8 %) |
| 60°S-30°S | +1.2 (+4.4 %)  | +0.9 (+5.1 %)  | -0.0 (-0.0 %)  | -0.5 (-1.4 %) | +0.2 (+2.0 %)  | +0.0 (+0.2 %) |
| 90°S-60°S | +0.1 (+0.1 %)  | -0.0 (-0.2 %)  | +0.0 (-0.4 %)  | +0.1 (+0.2 %) | -0.1 (-1.0 %)  | -0.1 (-2.9 %) |
| MAM       | EMAC O3S       |                |                | CMAM O3S      |                |               |
|           | 350 hPa        | 500 hPa        | Surface        | 350 hPa       | 500 hPa        | Surface       |
| 60°N-90°N | +1.8 (+2.5 %)  | +1.9 (+5.5 %)  | +0.8 (+5.1 %)  | -2.7 (-2.4 %) | +0.2 (+0.7 %)  | +0.7 (+6.7 %) |
| 30°N-60°N | +3.3 (+6.2 %)  | +2.1 (+6.4 %)  | +0.8 (+4.5 %)  | +1.6 (+2.7 %) | +0.8 (+2.9 %)  | +0.5 (+5.0 %) |
| 0°N-30°N  | +1.6 (+11.7 %) | +1.6 (+12.5 %) | +0.5 (+7.4 %)  | +0.4 (+2.1 %) | +0.4 (+1.7 %)  | +0.2 (+2.0 %) |
| 30°S-0°N  | +1.1 (+13.1 %) | +1.0 (+11.6 %) | +0.3 (+5.0 %)  | +0.4 (+4.0 %) | +0.2 (+1.8 %)  | +0.0 (+0.2 %) |
| 60°S-30°S | +1.3 (+4.7 %)  | +1.1 (+6.2 %)* | +0.4 (+4.0 %)  | -0.9 (-2.3 %) | -0.3 (-1.5 %)  | -0.2 (-2.5 %) |
| 90°S-60°S | +1.5 (+5.0 %)  | +0.9 (+5.9 %)* | +0.5 (+5.5 %)* | -0.9 (-2.0 %) | -0.3 (-1.9 %)  | -0.1 (-1.7 %) |
| JJA       | EMAC O3S       |                |                | CMAM O3S      |                |               |
|           | 350 hPa        | 500 hPa        | Surface        | 350 hPa       | 500 hPa        | Surface       |
| 60°N-90°N | +2.1 (+3.5 %)  | +1.8 (+7.3 %)  | +0.0 (+0.2 %)  | -1.4 (-2.7 %) | -0.5 (-3.9 %)  | -0.1 (-6.0 %) |
| 30°N-60°N | +2.5 (+6.3 %)  | +1.8 (+6.5 %)  | +0.1 (+0.7 %)  | -0.2 (-0.3 %) | -0.2 (-1.1 %)  | -0.1 (-2.4 %) |
| 0°N-30°N  | +1.1 (+9.9 %)  | +0.9 (+9.4 %)  | +0.1 (+2.9 %)  | +0.1 (+1.5 %) | +0.0 (+0.0 %)  | +0.0 (-0.6 %) |
| 30°S-0°N  | +1.4 (+11.2 %) | +1.5 (+12.3 %) | +0.5 (+4.4 %)  | +1.5 (+8.7 %) | +1.8 (+8.9 %)  | +0.3 (+3.6 %) |
| 60°S-30°S | +1.7 (+5.0 %)  | +1.4 (+6.1 %)* | +0.6 (+3.7 %)* | +1.0 (+2.4 %) | +0.7 (+2.8 %)  | -0.4 (-2.5 %) |
| 90°S-60°S | +0.8 (+3.0 %)  | +0.9 (+4.2 %)* | +0.6 (+4.3 %)* | -1.5 (-4.2 %) | -0.7 (-3.3 %)  | -0.5 (-3.9 %) |
| SON       | EMAC O3S       |                |                | CMAM O3S      |                |               |
|           | 350 hPa        | 500 hPa        | Surface        | 350 hPa       | 500 hPa        | Surface       |
| 60°N-90°N | +2.8 (+6.6 %)  | +1.5 (+7.0 %)* | +0.5 (+5.9 %)  | +0.3 (+0.8 %) | +0.0 (+0.1 %)  | +0.2 (+4.9 %) |
| 30°N-60°N | +1.7 (+5.2 %)  | +1.5 (+6.8 %)  | +0.4 (+4.0 %)  | +0.5 (+2.0 %) | +0.3 (+2.3 %)  | +0.1 (+1.9 %) |
| 0°N-30°N  | +0.7 (+8.9 %)  | +0.6 (+8.2 %)  | +0.1 (+3.7 %)  | +0.1 (+2.4 %) | +0.1 (+1.8 %)  | +0.1 (+1.7 %) |
| 30°S-0°N  | +1.2 (+11.8 %) | +1.2 (+11.5 %) | +0.1 (+2.4 %)  | +1.2 (+9.7 %) | +1.5 (+10.0 %) | +0.3 (+4.2 %) |
| 60°S-30°S | +1.1 (+2.7 %)  | +0.8 (+3.5 %)  | +0.0 (+0.2 %)  | +0.2 (+0.6 %) | +0.6 (+3.1 %)  | -0.1 (-0.5 %) |
| 90°S-60°S | +1.2 (+4.3 %)  | +0.4 (+2.5 %)  | +0.2 (+1.8 %)  | +1.2 (+5.2 %) | +0.1 (+1.0 %)  | -0.1 (-0.8 %) |

*Table S4 - 30° latitude band changes in seasonal mean stratospheric ozone (O<sub>3</sub>S) VMR (ppbv) (also expressed in percentage (%) terms) between 1980-89 and 2001-10 at 350 hPa, 500 hPa and the surface (left to right for each model). Values denoted with an asterisk (\*) represent statistical significance at the 95% confidence level (p < 0.05) as determined by a two-sided paired t-test.*
